# Supplementary material
Source: publisher site journal article supplement (https://www.dovepress.com/article/575704)

**Supplementary Material 1. Chinese and English versions of the 10-item Identity-Consequence Fatigue Scale**


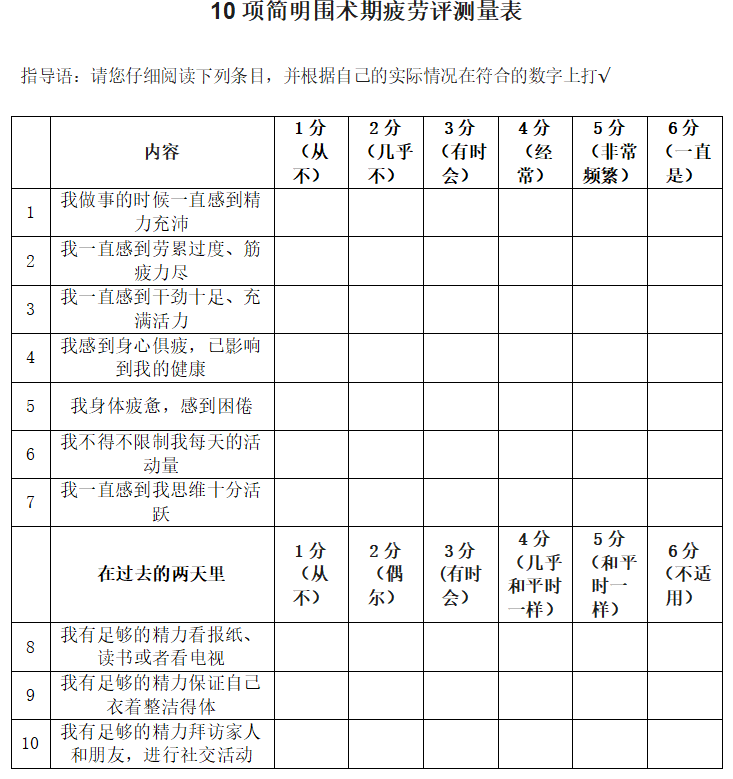


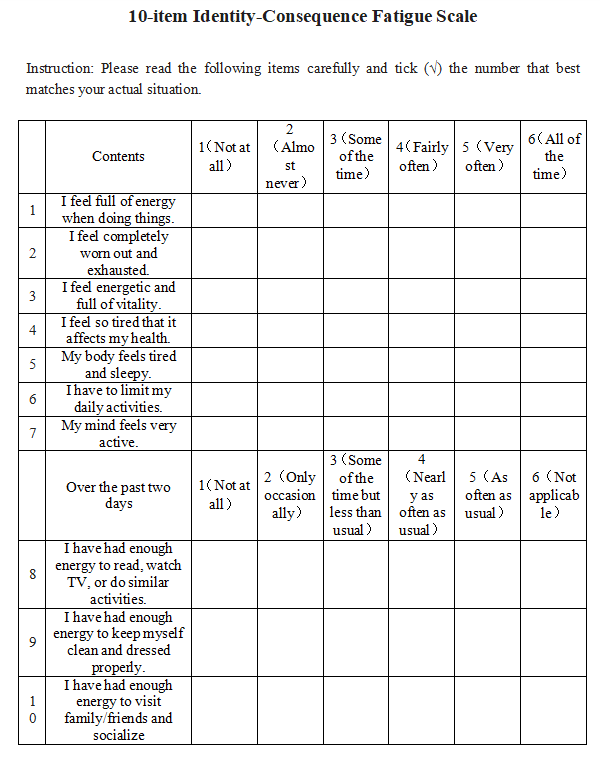

Supplement: Supplementary file 1 [file 575704_Supplementary%20Material%201.doc]
